# Supplementary material for: Excitation wavelength-induced color-tunable and white-light emissions in lanthanide(iii) coordination polymers constructed using an environment-dependent luminescent tetrazolate–dicarboxylate ligand
Source: Royal Society of Chemistry journal article supplement (doi:10.1039/c5ce02140e), 2015-12-18
Supplement: c5ce02140e1.pdf [file c5ce02140e1.pdf]

## Electronic Supplementary Information

### **Excitation wavelength-induced color tunable and white-light emissions in lanthanide(III) coordination polymers constructed by an environment-dependent luminescent tetrazolate-dicarboxylate ligand**

Yu Xiao,<sup>a,b</sup> Shuai-Hua Wang,<sup>a</sup> Fa-Kun Zheng,<sup>\*,a</sup> Mei-Feng Wu,<sup>c</sup> Ju-Xu,<sup>a</sup> Zhi-Fa Liu,<sup>a</sup> Jun Chen,<sup>a,b</sup> Rong Li<sup>a,b</sup> and Guo-Cong Guo<sup>a</sup>

<sup>a</sup> State Key Laboratory of Structural Chemistry, Fujian Institute of Research on the Structure of Matter, Chinese Academy of Sciences, Fuzhou, Fujian 350002, P. R. China

<sup>b</sup> University of Chinese Academy of Sciences, Beijing 100039, P. R. China

<sup>c</sup> School of Environmental and Chemical Engineering, Nanchang Hangkong University, Nanchang, Jiangxi 330063, P. R. China

**Table S1** Selected bond lengths (Å) and angles (°) for compounds **1-4**

| <b>1</b>            |            |                     |            |
|---------------------|------------|---------------------|------------|
| Sm(1)–O(2)#1        | 2.344(2)   | Sm(1)–O(3)          | 2.406(2)   |
| Sm(1)–O(1)#2        | 2.353(2)   | Sm(1)–O(2W)         | 2.445(3)   |
| Sm(1)–O(1W)         | 2.383(3)   | Sm(1)–O(4)#3        | 2.490(2)   |
| Sm(1)–O(3W)         | 2.389(3)   | Sm(1)–O(3)#3        | 2.616(2)   |
| O(2)#1–Sm(1)–O(1)#2 | 88.14(9)   | O(3)–Sm(1)–O(2W)    | 88.41(9)   |
| O(2)#1–Sm(1)–O(1W)  | 97.65(11)  | O(2)#1–Sm(1)–O(4)#3 | 78.34(8)   |
| O(1)#2–Sm(1)–O(1W)  | 141.75(10) | O(1)#2–Sm(1)–O(4)#3 | 145.61(10) |
| O(2)#1–Sm(1)–O(3W)  | 85.46(11)  | O(1W)–Sm(1)–O(4)#3  | 72.02(10)  |
| O(1)#2–Sm(1)–O(3W)  | 71.22(10)  | O(3W)–Sm(1)–O(4)#3  | 76.25(9)   |
| O(1W)–Sm(1)–O(3W)   | 146.70(10) | O(3)–Sm(1)–O(4)#3   | 117.72(8)  |

|                    |            |                     |           |
|--------------------|------------|---------------------|-----------|
| O(2)#1–Sm(1)–O(3)  | 163.16(9)  | O(2W)–Sm(1)–O(4)#3  | 132.28(8) |
| O(1)#2–Sm(1)–O(3)  | 80.77(9)   | O(2)#1–Sm(1)–O(3)#3 | 128.19(8) |
| O(1W)–Sm(1)–O(3)   | 83.67(10)  | O(1)#2–Sm(1)–O(3)#3 | 126.77(8) |
| O(3W)–Sm(1)–O(3)   | 102.71(10) | O(1W)–Sm(1)–O(3)#3  | 77.84(10) |
| O(2)#1–Sm(1)–O(2W) | 76.12(9)   | O(3W)–Sm(1)–O(3)#3  | 74.45(9)  |
| O(1)#2–Sm(1)–O(2W) | 72.54(9)   | O(3)–Sm(1)–O(3)#3   | 68.57(9)  |
| O(1W)–Sm(1)–O(2W)  | 72.31(10)  | O(2W)–Sm(1)–O(3)#3  | 144.06(9) |
| O(3W)–Sm(1)–O(2W)  | 139.62(10) | O(4)#3–Sm(1)–O(3)#3 | 50.86(8)  |

Symmetry transformations used to generate equivalent atoms: for **1**: (#1)  $x, y - 1, z$ ; (#2)  $-x + 1, -y + 2, -z$ ; (#3)  $-x, -y + 1, -z$ .

## 2

|                     |            |                     |            |
|---------------------|------------|---------------------|------------|
| Eu(1)–O(3)#1        | 2.335(2)   | Eu(1)–O(1)          | 2.392(2)   |
| Eu(1)–O(4)#2        | 2.347(3)   | Eu(1)–O(2W)         | 2.436(2)   |
| Eu(1)–O(3W)         | 2.368(3)   | Eu(1)–O(2)#3        | 2.480(2)   |
| Eu(1)–O(1W)         | 2.372(3)   | Eu(1)–O(1)#3        | 2.609(2)   |
| O(3)#1–Eu(1)–O(4)#2 | 88.27(8)   | O(1)–Eu(1)–O(2W)    | 88.52(9)   |
| O(3)#1–Eu(1)–O(3W)  | 72.39(9)   | O(3)#1–Eu(1)–O(2)#3 | 146.43(10) |
| O(4)#2–Eu(1)–O(3W)  | 85.60(10)  | O(4)#2–Eu(1)–O(2)#3 | 78.46(8)   |
| O(3)#1–Eu(1)–O(1W)  | 140.88(10) | O(3W)–Eu(1)–O(2)#3  | 75.92(9)   |
| O(4)#2–Eu(1)–O(1W)  | 97.59(10)  | O(1W)–Eu(1)–O(2)#3  | 72.06(9)   |
| O(3W)–Eu(1)–O(1W)   | 146.41(9)  | O(1)–Eu(1)–O(2)#3   | 117.50(8)  |
| O(3)#1–Eu(1)–O(1)   | 80.59(8)   | O(2W)–Eu(1)–O(2)#3  | 132.16(8)  |
| O(4)#2–Eu(1)–O(1)   | 163.23(8)  | O(3)#1–Eu(1)–O(1)#3 | 126.82(8)  |
| O(3W)–Eu(1)–O(1)    | 102.71(10) | O(4)#2–Eu(1)–O(1)#3 | 128.45(7)  |
| O(1W)–Eu(1)–O(1)    | 83.61(10)  | O(3W)–Eu(1)–O(1)#3  | 73.90(9)   |
| O(3)#1–Eu(1)–O(2W)  | 72.00(9)   | O(1W)–Eu(1)–O(1)#3  | 78.23(10)  |
| O(4)#2–Eu(1)–O(2W)  | 76.07(9)   | O(1)–Eu(1)–O(1)#3   | 68.24(8)   |

|                   |           |                     |           |
|-------------------|-----------|---------------------|-----------|
| O(3W)–Eu(1)–O(2W) | 140.16(9) | O(2W)–Eu(1)–O(1)#3  | 144.06(8) |
| O(1W)–Eu(1)–O(2W) | 72.04(9)  | O(2)#3–Eu(1)–O(1)#3 | 51.06(8)  |

Symmetry transformations used to generate equivalent atoms: for **2**: (#1)  $-x + 1, -y + 2, -z$ ; (#2)  $x, y - 1, z$ ; (#3)  $-x, -y + 1, -z$ .

### 3

|                     |            |                    |           |
|---------------------|------------|--------------------|-----------|
| Gd(1)–O(3)#1        | 2.318(3)   | Gd(1)–O(1)#3       | 2.365(3)  |
| Gd(1)–O(4)#2        | 2.322(2)   | Gd(1)–O(1W)        | 2.407(2)  |
| Gd(1)–O(2W)         | 2.339(3)   | Gd(1)–O(2)         | 2.460(2)  |
| Gd(1)–O(3W)         | 2.347(3)   | Gd(1)–O(1)         | 2.599(2)  |
| O(3)#1–Gd(1)–O(4)#2 | 88.04(9)   | O(1)#3–Gd(1)–O(1W) | 88.30(9)  |
| O(3)#1–Gd(1)–O(2W)  | 85.29(10)  | O(3)#1–Gd(1)–O(2)  | 78.46(8)  |
| O(4)#2–Gd(1)–O(2W)  | 71.76(9)   | O(4)#2–Gd(1)–O(2)  | 145.66(9) |
| O(3)#1–Gd(1)–O(3W)  | 97.76(11)  | O(2W)–Gd(1)–O(2)   | 75.74(9)  |
| O(4)#2–Gd(1)–O(3W)  | 141.80(10) | O(3W)–Gd(1)–O(2)   | 71.93(9)  |
| O(2W)–Gd(1)–O(3W)   | 146.14(10) | O(1)#3–Gd(1)–O(2)  | 117.55(8) |
| O(3)#1–Gd(1)–O(1)#3 | 163.23(8)  | O(1W)–Gd(1)–O(2)   | 132.24(9) |
| O(4)#2–Gd(1)–O(1)#3 | 80.86(9)   | O(3)#1–Gd(1)–O(1)  | 128.67(8) |
| O(2W)–Gd(1)–O(1)#3  | 102.90(11) | O(4)#2–Gd(1)–O(1)  | 126.33(9) |
| O(3W)–Gd(1)–O(1)#3  | 83.65(11)  | O(2W)–Gd(1)–O(1)   | 74.02(9)  |
| O(3)#1–Gd(1)–O(1W)  | 76.36(9)   | O(3W)–Gd(1)–O(1)   | 78.05(10) |
| O(4)#2–Gd(1)–O(1W)  | 72.72(9)   | O(1)#3–Gd(1)–O(1)  | 68.04(9)  |
| O(2W)–Gd(1)–O(1W)   | 140.31(9)  | O(1W)–Gd(1)–O(1)   | 143.73(9) |
| O(3W)–Gd(1)–O(1W)   | 72.12(9)   | O(2)–Gd(1)–O(1)    | 51.29(8)  |

Symmetry transformations used to generate equivalent atoms: for **3**: (#1)  $-x, -y + 2, -z$ ; (#2)  $x + 1, y + 1, z$ ; (#3)  $-x, -y + 3, -z$ .

### 4

|              |          |              |          |
|--------------|----------|--------------|----------|
| Gd(1)–O(3)#1 | 2.324(2) | Gd(1)–O(1)#3 | 2.374(2) |
| Gd(1)–O(4)#2 | 2.330(2) | Gd(1)–O(1W)  | 2.414(2) |

---

|                     |           |                    |           |
|---------------------|-----------|--------------------|-----------|
| Gd(1)–O(2W)         | 2.350(2)  | Gd(1)–O(2)         | 2.467(2)  |
| Gd(1)–O(3W)         | 2.347(3)  | Gd(1)–O(1)         | 2.609(2)  |
| Eu(1)–O(3)#1        | 2.324(2)  | Eu(1)–O(1)#3       | 2.374(2)  |
| Eu(1)–O(4)#2        | 2.330(2)  | Eu(1)–O(1W)        | 2.414(2)  |
| Eu(1)–O(2W)         | 2.350(2)  | Eu(1)–O(2)         | 2.467(2)  |
| Eu(1)–O(3W)         | 2.347(3)  | Eu(1)–O(1)         | 2.609(2)  |
| O(3)#1–Gd(1)–O(4)#2 | 87.86(8)  | O(1)#3–Gd(1)–O(1W) | 88.44(8)  |
| O(3)#1–Gd(1)–O(2W)  | 85.58(9)  | O(3)#1–Gd(1)–O(2)  | 78.46(7)  |
| O(4)#2–Gd(1)–O(2W)  | 71.65(8)  | O(4)#2–Gd(1)–O(2)  | 145.66(8) |
| O(3)#1–Gd(1)–O(3W)  | 97.70(9)  | O(2W)–Gd(1)–O(2)   | 75.97(8)  |
| O(4)#2–Gd(1)–O(3W)  | 141.71(9) | O(3W)–Gd(1)–O(2)   | 71.96(9)  |
| O(2W)–Gd(1)–O(3W)   | 146.32(9) | O(1)#3–Gd(1)–O(2)  | 117.72(7) |
| O(3)#1–Gd(1)–O(1)#3 | 163.08(8) | O(1W)–Gd(1)–O(2)   | 131.97(8) |
| O(4)#2–Gd(1)–O(1)#3 | 80.83(8)  | O(3)#1–Gd(1)–O(1)  | 128.53(7) |
| O(2W)–Gd(1)–O(1)#3  | 102.55(9) | O(4)#2–Gd(1)–O(1)  | 126.57(7) |
| O(3W)–Gd(1)–O(1)#3  | 83.82(9)  | O(2W)–Gd(1)–O(1)   | 73.90(8)  |
| O(3)#1–Gd(1)–O(1W)  | 76.14(8)  | O(3W)–Gd(1)–O(1)   | 78.14(9)  |
| O(4)#2–Gd(1)–O(1W)  | 72.80(8)  | O(1)#3–Gd(1)–O(1)  | 68.34(8)  |
| O(2W)–Gd(1)–O(1W)   | 140.37(8) | O(1W)–Gd(1)–O(1)   | 143.86(8) |
| O(3W)–Gd(1)–O(1W)   | 71.92(9)  | O(2)–Gd(1)–O(1)    | 51.16(7)  |
| O(3)#1–Eu(1)–O(4)#2 | 87.86(8)  | O(1)#3–Eu(1)–O(1W) | 88.44(8)  |
| O(3)#1–Eu(1)–O(2W)  | 85.58(9)  | O(3)#1–Eu(1)–O(2)  | 78.46(7)  |
| O(4)#2–Eu(1)–O(2W)  | 71.65(8)  | O(4)#2–Eu(1)–O(2)  | 145.66(8) |
| O(3)#1–Eu(1)–O(3W)  | 97.70(9)  | O(2W)–Eu(1)–O(2)   | 75.97(8)  |
| O(4)#2–Eu(1)–O(3W)  | 141.71(9) | O(3W)–Eu(1)–O(2)   | 71.96(9)  |
| O(2W)–Eu(1)–O(3W)   | 146.32(9) | O(1)#3–Eu(1)–O(2)  | 117.72(7) |
| O(3)#1–Eu(1)–O(1)#3 | 163.08(8) | O(1W)–Eu(1)–O(2)   | 131.97(8) |

---

|                     |           |                   |           |
|---------------------|-----------|-------------------|-----------|
| O(4)#2-Eu(1)-O(1)#3 | 80.83(8)  | O(3)#1-Eu(1)-O(1) | 128.53(7) |
| O(2W)-Eu(1)-O(1)#3  | 102.55(9) | O(4)#2-Eu(1)-O(1) | 126.57(7) |
| O(3W)-Eu(1)-O(1)#3  | 83.82(9)  | O(2W)-Eu(1)-O(1)  | 73.90(8)  |
| O(3)#1-Eu(1)-O(1W)  | 76.14(8)  | O(3W)-Eu(1)-O(1)  | 78.14(9)  |
| O(4)#2-Eu(1)-O(1W)  | 72.80(8)  | O(1)#3-Eu(1)-O(1) | 68.34(8)  |
| O(2W)-Eu(1)-O(1W)   | 140.37(8) | O(1W)-Eu(1)-O(1)  | 143.86(8) |
| O(3W)-Eu(1)-O(1W)   | 71.92(9)  | O(2)-Eu(1)-O(1)   | 51.16(7)  |

Symmetry transformations used to generate equivalent atoms: for 4: (#1)  $-x, -y, -z$ ; (#2)  $x + 1, y + 1, z$ ; (#3)  $-x, -y + 1, -z$ ; (#4)  $x - 1, y - 1, z$ .

**Table S2** CIE coordinates (x, y), CRI and CCT for compound **1**

| $\lambda_{\text{ex}}/\text{nm}$ | (x, y)       | CRI | CCT/K |
|---------------------------------|--------------|-----|-------|
| 340                             | (0.53, 0.36) | 33  | 1728  |
| 345                             | (0.49, 0.35) | 43  | 1833  |
| 350                             | (0.44, 0.34) | 65  | 2301  |
| 352                             | (0.41, 0.33) | 73  | 2739  |
| 354                             | (0.38, 0.32) | 79  | 3480  |
| 356                             | (0.35, 0.32) | 84  | 4454  |
| 358                             | (0.33, 0.31) | 87  | 5748  |
| 360                             | (0.31, 0.31) | 90  | 7000  |
| 365                             | (0.29, 0.30) | 94  | 8716  |
| 370                             | (0.26, 0.30) | 87  | 10958 |
| 384                             | (0.25, 0.30) | 78  | 11849 |

**Table S3** CIE coordinates (x, y), CRI and CCT for compound **4**

| $\lambda_{\text{ex}}/\text{nm}$ | (x, y)       | CRI | CCT/K |
|---------------------------------|--------------|-----|-------|
| 340                             | (0.48, 0.34) | 56  | 1915  |
| 345                             | (0.45, 0.35) | 67  | 2301  |
| 350                             | (0.41, 0.34) | 75  | 3025  |
| 355                             | (0.36, 0.34) | 84  | 4177  |
| 360                             | (0.33, 0.33) | 89  | 5489  |
| 365                             | (0.31, 0.32) | 92  | 6957  |
| 370                             | (0.29, 0.31) | 94  | 8206  |

**Table S4** CIE coordinates(x, y) for the Eu(III)-doped Gd(III) frameworks

| $\lambda_{\text{ex}}/\text{nm}$ | <b>Eu<sub>0.009</sub>Gd<sub>0.99</sub></b><br>1<br>(x, y) | <b>Eu<sub>0.02</sub>Gd<sub>0.9</sub></b><br>8<br>(x,y) | <b>Eu<sub>0.04</sub>Gd<sub>0.9</sub></b><br>6<br>(x, y) | <b>Eu<sub>0.06</sub>Gd<sub>0.9</sub></b><br>4<br>(x, y) | <b>Eu<sub>0.07</sub>Gd<sub>0.9</sub></b><br>3<br>(x, y) | <b>Eu<sub>0.11</sub>Gd<sub>0.8</sub></b><br>9<br>(x, y) |
|---------------------------------|-----------------------------------------------------------|--------------------------------------------------------|---------------------------------------------------------|---------------------------------------------------------|---------------------------------------------------------|---------------------------------------------------------|
| 340                             | (0.40, 0.47)                                              | (0.42, 0.45)                                           | (0.43, 0.43)                                            | (0.45, 0.39)                                            | (0.43, 0.41)                                            | (0.48, 0.33)                                            |
| 345                             | (0.39, 0.47)                                              | (0.40, 0.45)                                           | (0.42, 0.43)                                            | (0.43, 0.40)                                            | (0.41, 0.40)                                            | (0.45, 0.34)                                            |
| 350                             | (0.38, 0.46)                                              | (0.39, 0.44)                                           | (0.40, 0.43)                                            | (0.40, 0.39)                                            | (0.39, 0.39)                                            | (0.40, 0.33)                                            |
| 355                             | (0.36, 0.44)                                              | (0.36, 0.42)                                           | (0.37, 0.41)                                            | (0.37, 0.38)                                            | (0.35, 0.37)                                            | (0.36, 0.32)                                            |
| 360                             | (0.34, 0.41)                                              | (0.34, 0.39)                                           | (0.34, 0.38)                                            | (0.33, 0.36)                                            | (0.32, 0.34)                                            | (0.32, 0.31)                                            |
| 365                             | (0.31, 0.38)                                              | (0.31, 0.37)                                           | (0.30, 0.35)                                            | (0.31, 0.34)                                            | (0.29, 0.32)                                            | (0.30, 0.30)                                            |
| 370                             | (0.28, 0.35)                                              | (0.28, 0.34)                                           | (0.28, 0.33)                                            | (0.29, 0.32)                                            | (0.27, 0.30)                                            | (0.28, 0.30)                                            |

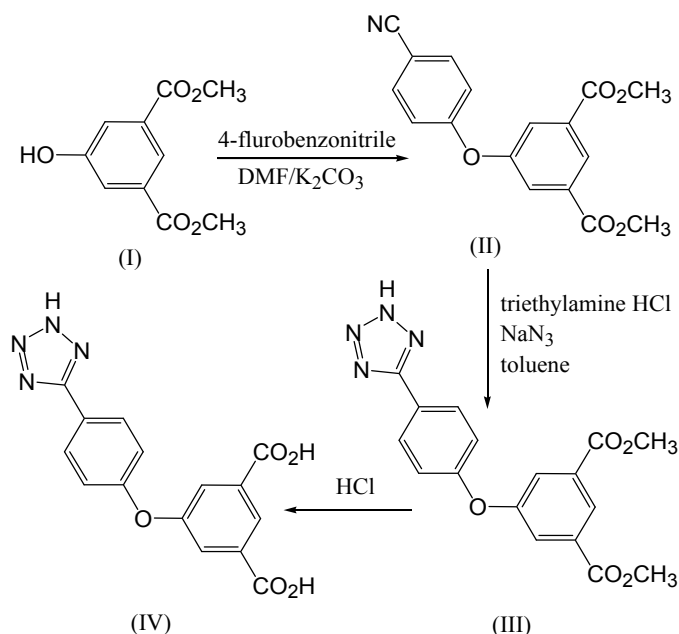

**Scheme S1** The synthetic route of H<sub>3</sub>TPIA

**Synthesis of dimethyl 5-(4-cyanophenoxy)isophthalate (II).** The mixture of 4-fluorobenzonitrile (12.1 g, 0.1 mol), dimethyl 5-hydroxyisophthalate I (10.5 g, 0.05 mol) and K<sub>2</sub>CO<sub>3</sub> (13.8 g, 0.1 mol) in 500 mL DMF was refluxed for overnight under N<sub>2</sub> atmosphere and then poured into cold water. Pure product of II was obtained from recrystallization in EtOH with a yield of 95%. Anal. Calcd for C<sub>17</sub>H<sub>13</sub>NO<sub>5</sub>: C, 65.59; H, 4.21; N, 4.50%. Found: C, 65.42; H, 4.15; N, 4.33%.

**Synthesis of dimethyl 5-(4-(2H-tetrazol-5-yl)phenoxy)isophthalate (III).** The mixture of II (3.1 g, 0.01 mol), NaN<sub>3</sub> (2.0 g, 0.03 mol), and triethylamine hydrochloride (4.1 g, 0.03 mol) in 100 mL toluene was refluxed for 3 days under N<sub>2</sub> atmosphere and then 100 mL 0.1 M NaOH was dropped. The water solution was separated and acidified with dilute hydrochloric acid. White solid was obtained and recrystallized in EtOH with a yield of 90%. ESI-MS: m/z [M - H]<sup>-</sup>, 353.3 (calcd for C<sub>17</sub>H<sub>14</sub>N<sub>4</sub>O<sub>5</sub>, 354.3). Anal. Calcd for C<sub>17</sub>H<sub>14</sub>N<sub>4</sub>O<sub>5</sub>: C, 57.63; H, 3.98; N, 15.81%. Found: C, 57.52; H, 3.90; N, 15.83%.

**Synthesis of 5-(4-(tetrazol-5-yl)phenoxy) isophthalic acid IV (H<sub>3</sub>TPIA).** The mixture of **III** (1.8 g, 0.005 mol) and 2 mL concentrated hydrochloric acid in 100 mL H<sub>2</sub>O was refluxed for 1 day and then filtrated. The white solid was recrystallized in EtOH with a yield of 92%. ESI-MS: m/z [M - H]<sup>-</sup>, 325.4 (calcd for C<sub>15</sub>H<sub>10</sub>N<sub>4</sub>O<sub>5</sub>, 326.3). Anal. Calcd for C<sub>15</sub>H<sub>10</sub>N<sub>4</sub>O<sub>5</sub>: C, 55.22; H, 3.09; N, 17.17%. Found: C, 55.15; H, 2.96; N, 17.05%.

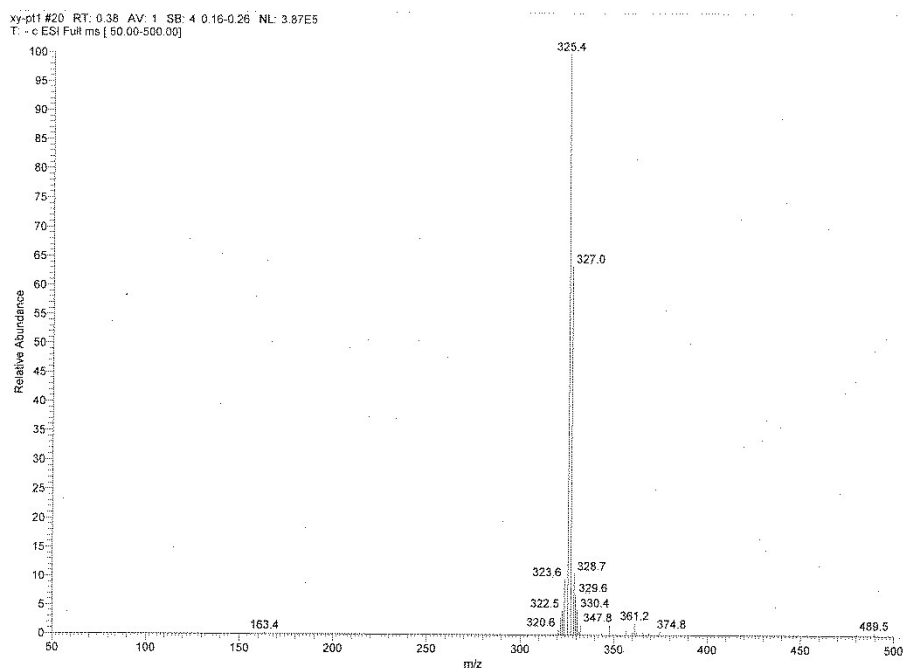

**Fig. S1** ESI-MS of H<sub>3</sub>TPIA



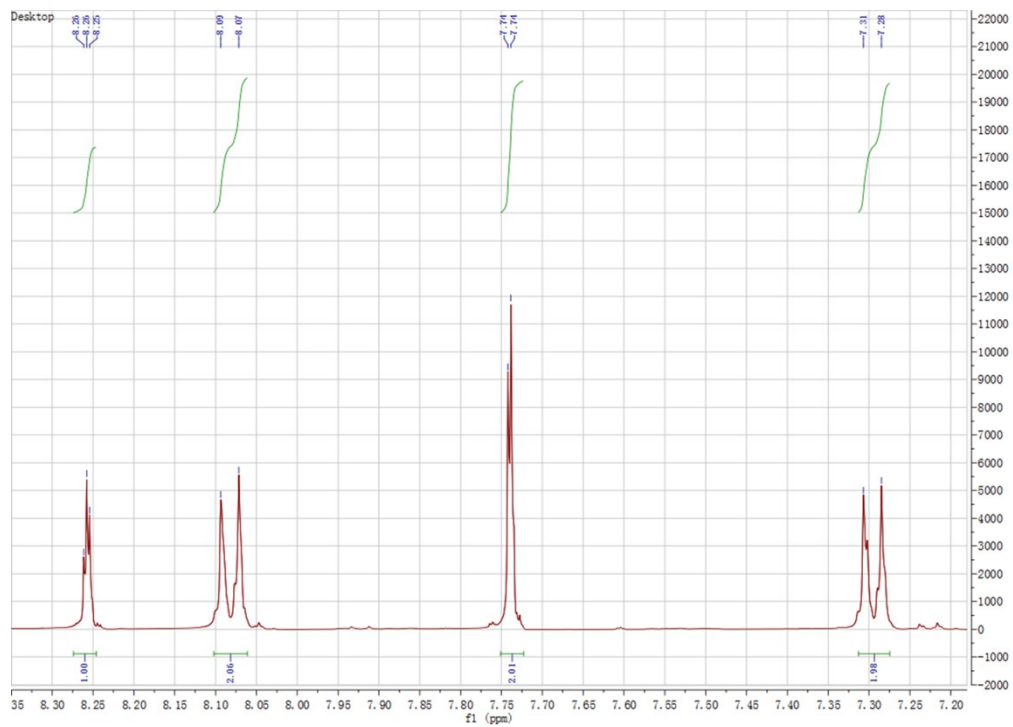

**Fig. S2**  $^1\text{H}$  NMR spectrum of  $\text{H}_3\text{TPIA}$  in  $\text{DMSO-d}_6$

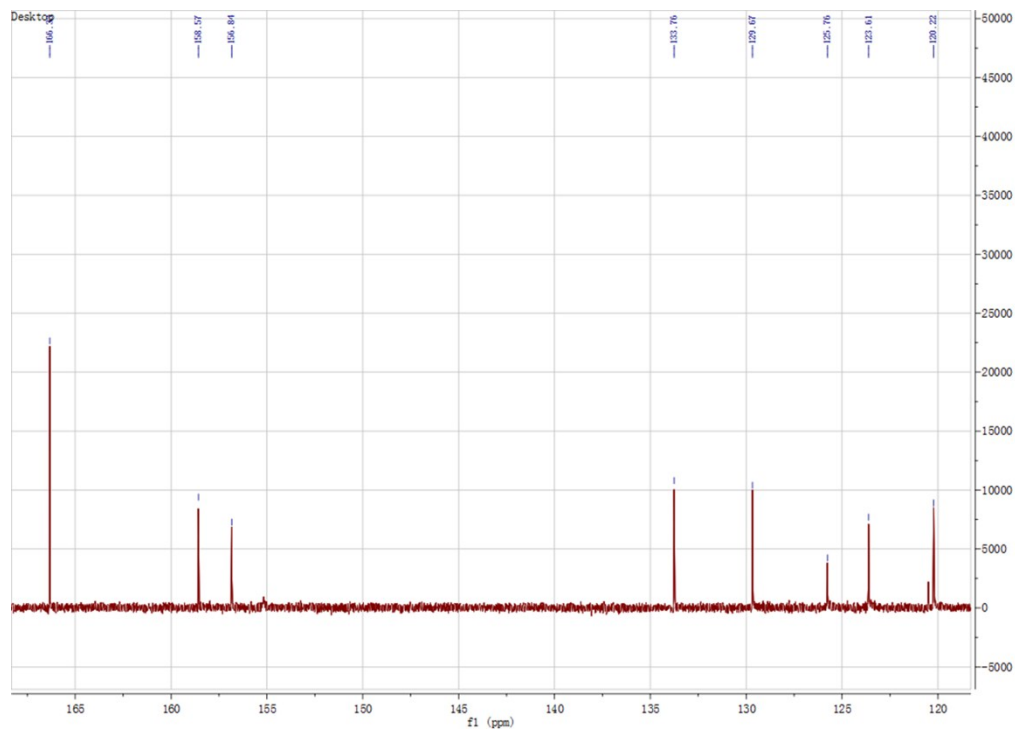

**Fig. S3**  $^{13}\text{C}$  NMR spectrum of  $\text{H}_3\text{TPIA}$  in  $\text{DMSO-d}_6$

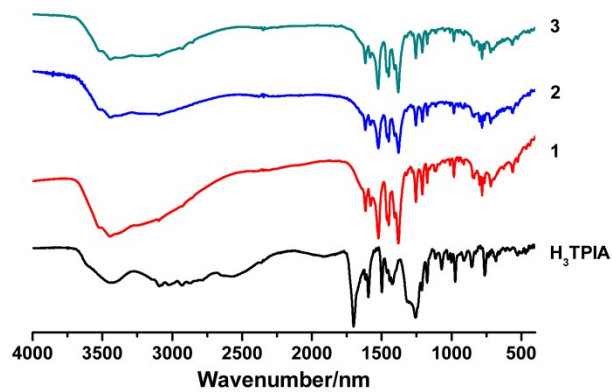

**Fig. S4** FT-IR of H<sub>3</sub>TPIA and 1–3.

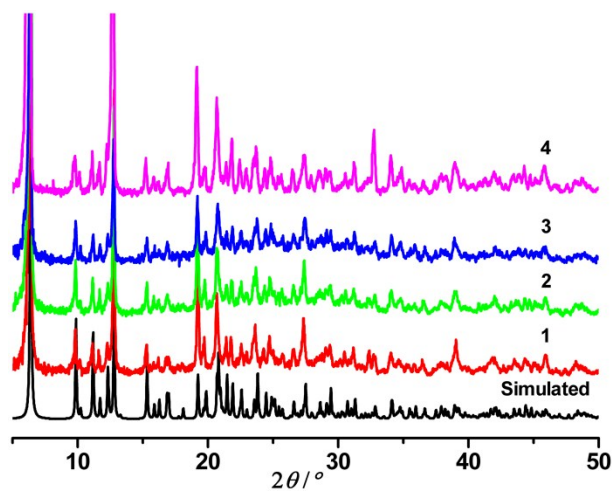

**Fig. S5** PXRD patterns for the as-synthesized compounds 1–4 and the simulated one from single-crystal X-ray diffraction data.

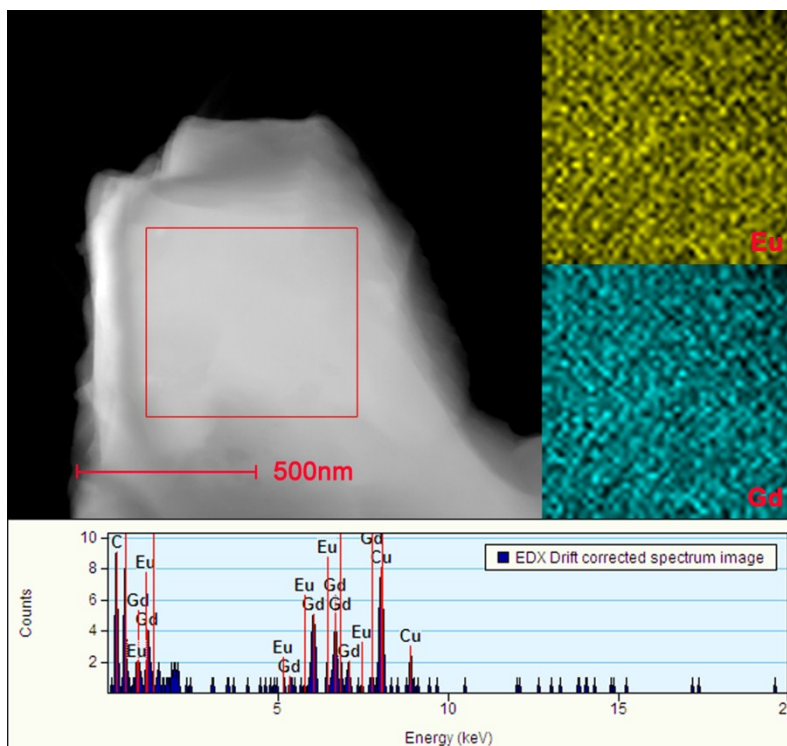

**Fig. S6** Electron microscopy mapping studies of a portion of the  $[(\text{Eu}_{0.12}\text{Gd}_{0.88})(\text{TPIA})(\text{H}_2\text{O})_3]\cdot 5.5\text{H}_2\text{O}$  (**4**).

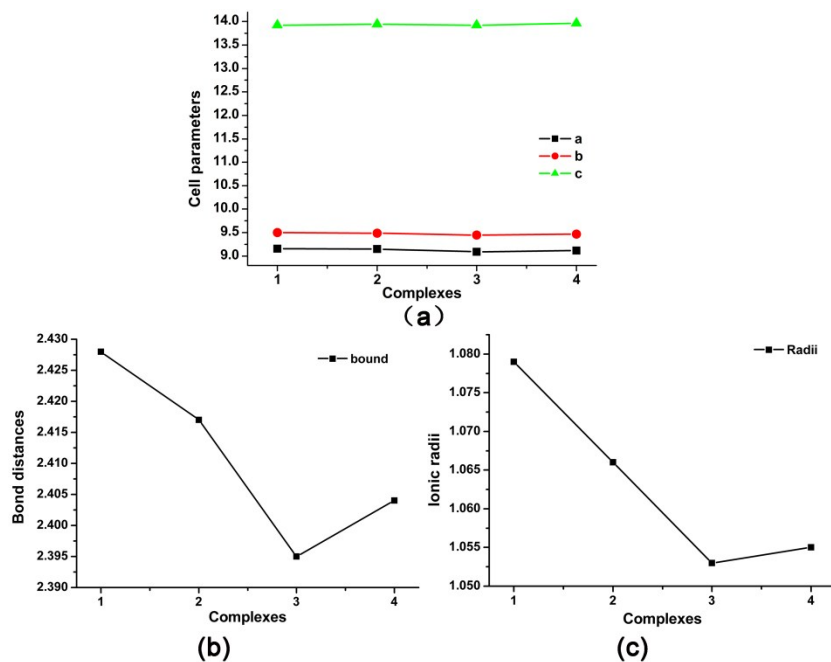

**Fig. S7** (a) Cell parameters. (b) Crystallographically identified Ln–O bond distances. (c) Ideal Ln(III) ionic radii in mono- and bimetallic Ln-MOFs (normalized for mixed Ln(III) ions according to corresponding Ln(III) ion content in mixed-Ln-MOFs **4**).

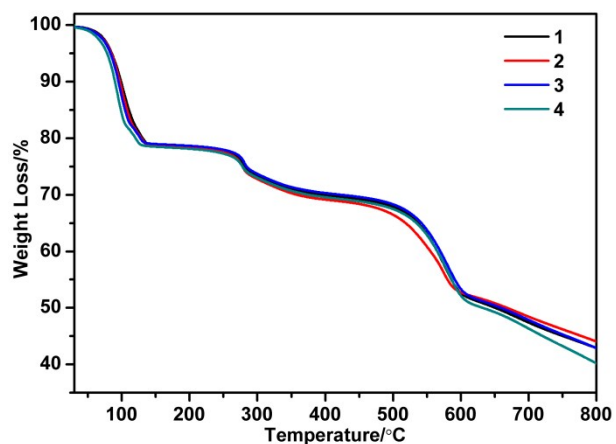

**Fig. S8** The TGA curves of compounds **1–4**.

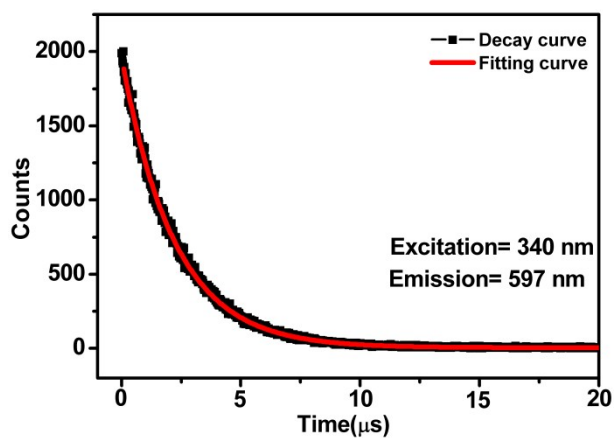

**Fig. S9** The fluorescent decay curves for **1**

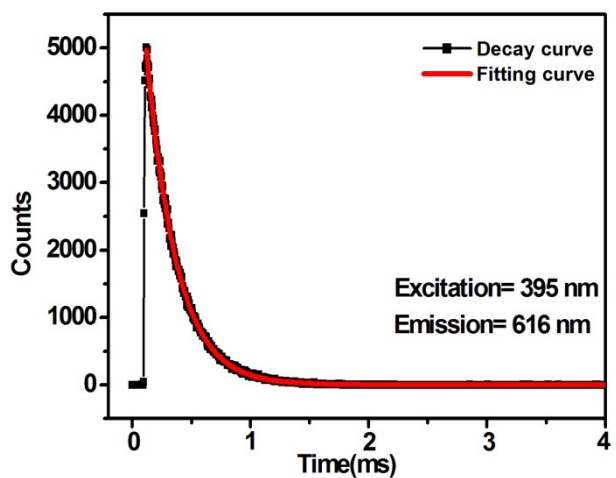

**Fig. S10** The fluorescent decay curves for **2**

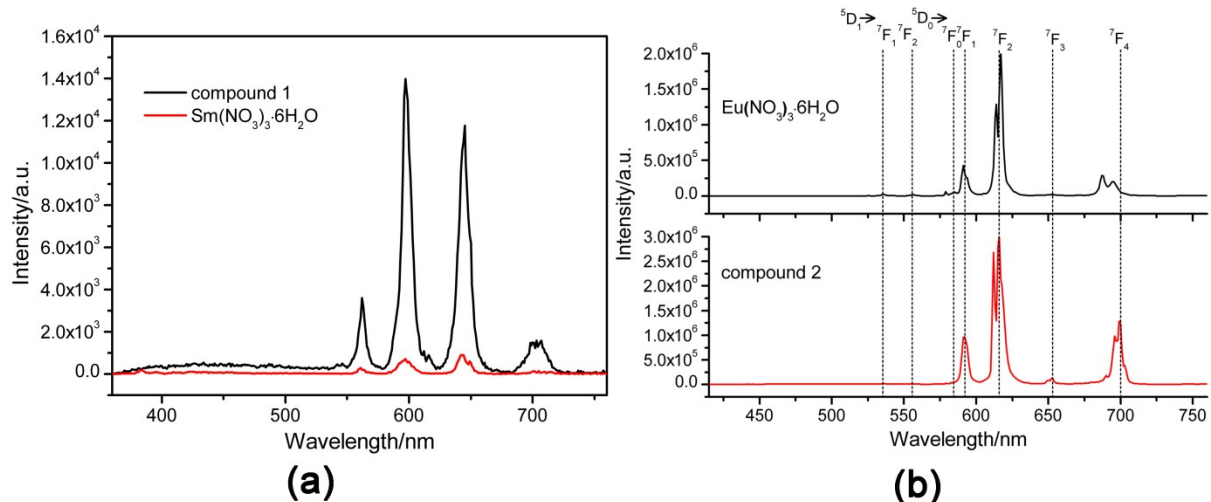

**Fig. S11** (a) Emission spectra of compound **1** and  $\text{Sm}(\text{NO}_3)_3 \cdot 6\text{H}_2\text{O}$  when excited at 340 nm; (b) Emission spectra of compound **2** and  $\text{Eu}(\text{NO}_3)_3 \cdot 6\text{H}_2\text{O}$  when excited at 395 nm.

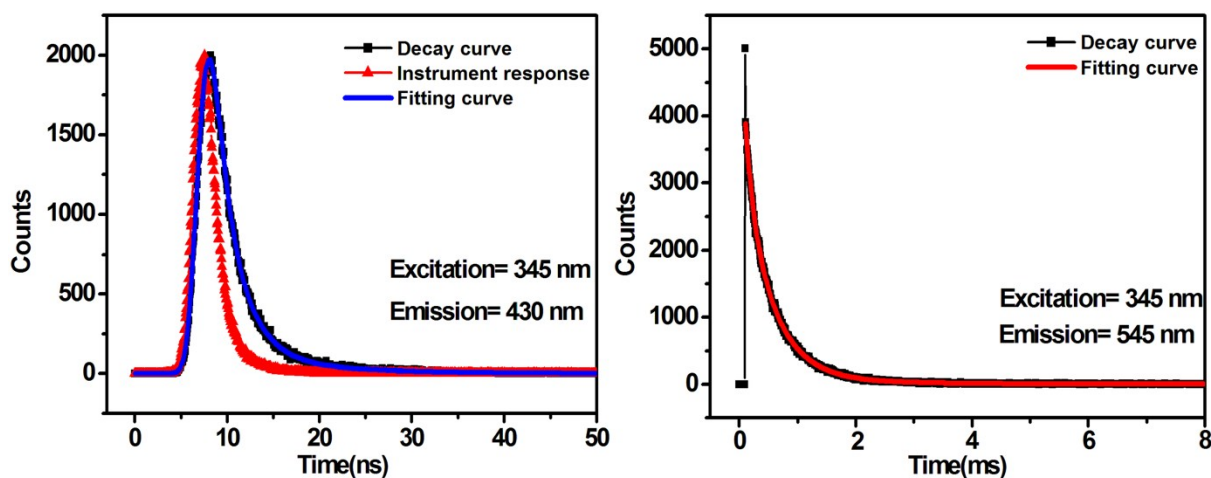

**Fig. S12** The fluorescent decay curves for **3**

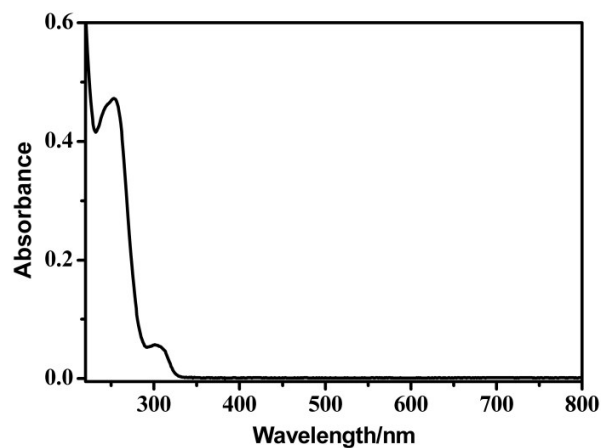

**Fig. S13** UV-Vis absorption spectra of the free ligand H<sub>3</sub>TPIA in methanol solution.

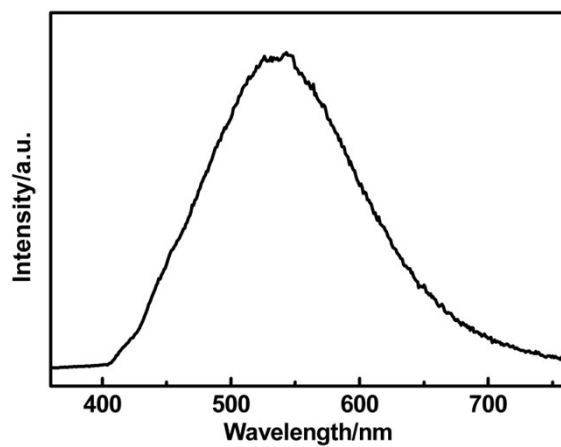

**Fig. S14** The emission spectrum of **3** at 77K

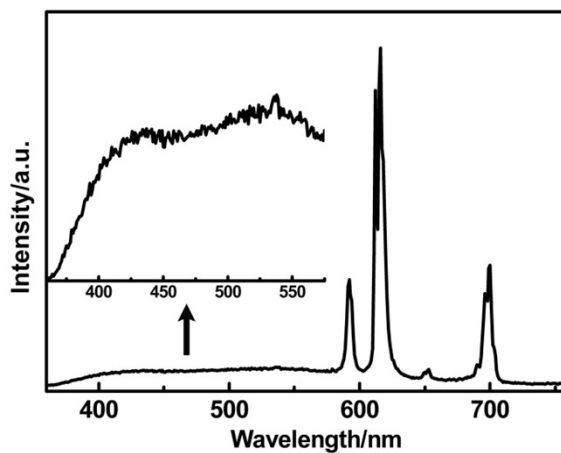

**Fig. S15** The emission spectrum of **4** excited at 340 nm

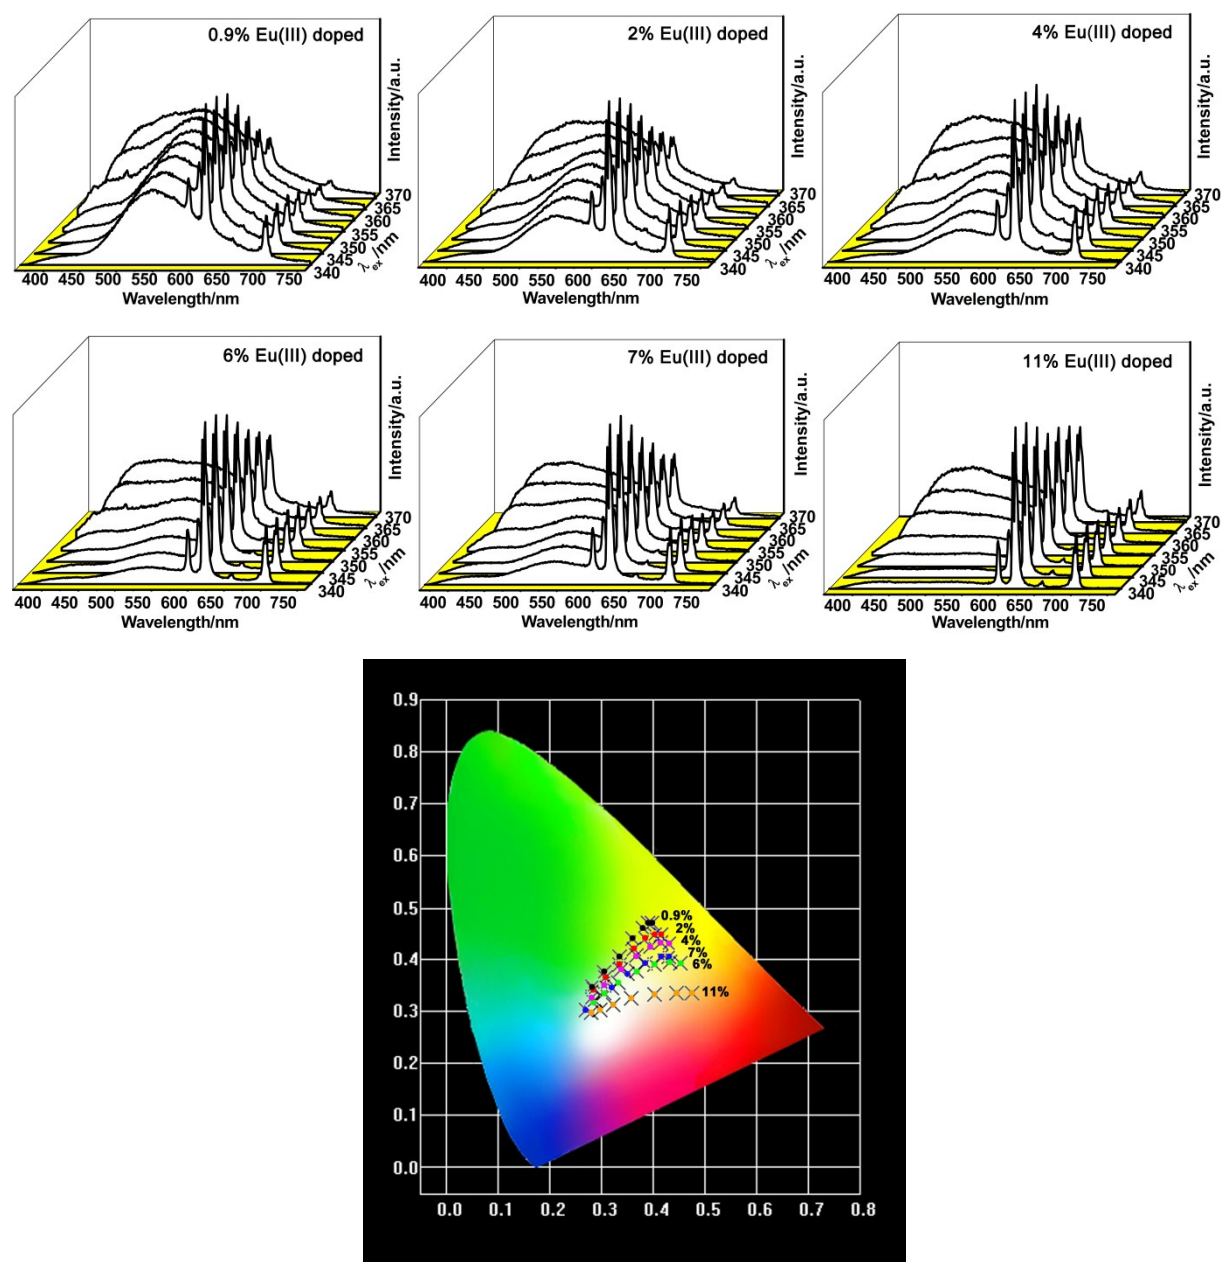

**Fig. S16** The emission spectra (upper) and 1931 CIE chromaticity diagrams (lower) of different doping concentrations of Eu(III) ion embedded in **3** excited at different wavelengths.
